# Supplementary material for: Diagnostic SARS-CoV-2 Cycle Threshold Value Predicts Disease Severity, Survival, and Six-Month Sequelae in COVID-19 Symptomatic Patients
Source: PubMed Central journal article supplement (PMC7917896; doi:10.3390/v13020281), 2021-02-11
Supplement: viruses-13-00281-s001.pdf [file viruses-13-00281-s001.pdf]

Supplementary Material

|                                                       |   |                       |    |     |      |       |                           |                   |              |                    |  |
|-------------------------------------------------------|---|-----------------------|----|-----|------|-------|---------------------------|-------------------|--------------|--------------------|--|
| <b>Patient Identificative Code</b>                    |   |                       |    |     |      |       | <b>PCR Ct</b>             |                   |              |                    |  |
| <b>First positive swab (date)</b>                     |   | <b>Age</b>            |    |     |      |       | <b>Hospital Admission</b> |                   | Yes          | No                 |  |
| <b>Sex</b>                                            | M | F                     |    |     |      |       | <b>Outcome</b>            | Complete recovery | Death        | Sequelae (specify) |  |
| <b>Confirmative negative swab (date)</b>              |   | <b>Oxygen support</b> | No | Yes | CPAP | Intub | <b>Comorbid.</b>          | Diabetes          | Hypertension | Overweight/obesity |  |
|                                                       |   |                       |    |     |      |       | Asthma                    | COPD              | Cancer       | Act. Smoking       |  |
| <b>Time from COVID-19 onset and first swab (days)</b> |   |                       |    |     |      |       | Other (specify)           |                   |              |                    |  |
| <b>Signs and Symptoms at the diagnosis</b>            |   |                       |    |     |      |       |                           |                   |              |                    |  |
| <b>Notes</b>                                          |   |                       |    |     |      |       |                           |                   |              |                    |  |

**Figure S1.** Phone survey questionnaire.

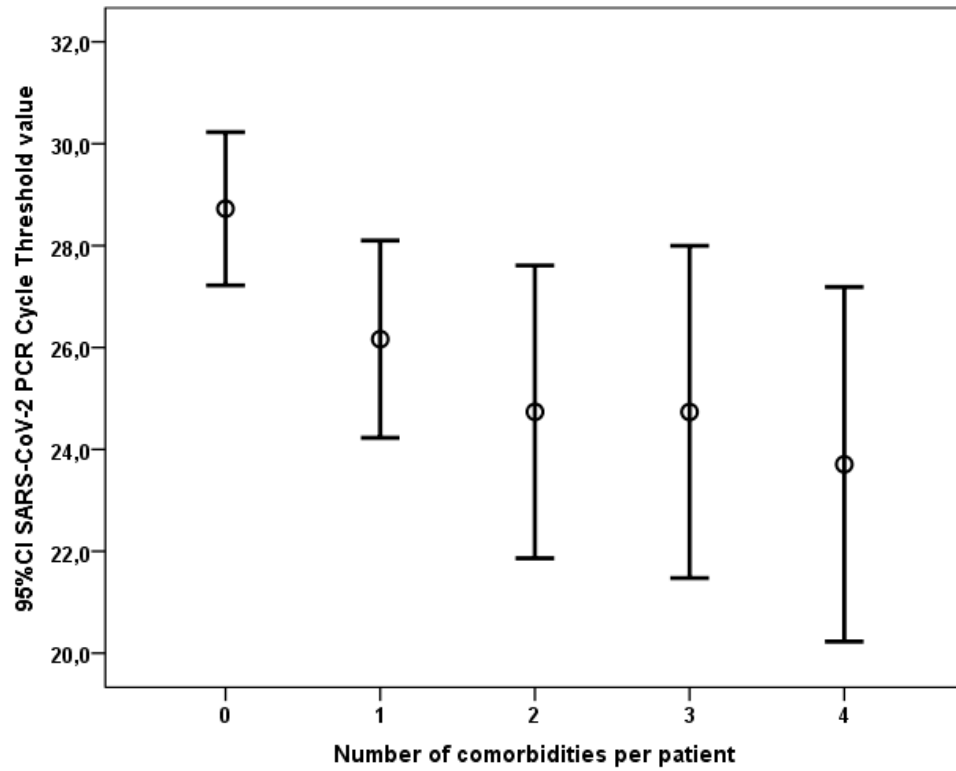

**Figure S2.** Distribution of SARS-CoV-2 PCR Cycle threshold values according to the number of comorbidities per patient at COVID-19 diagnosis.

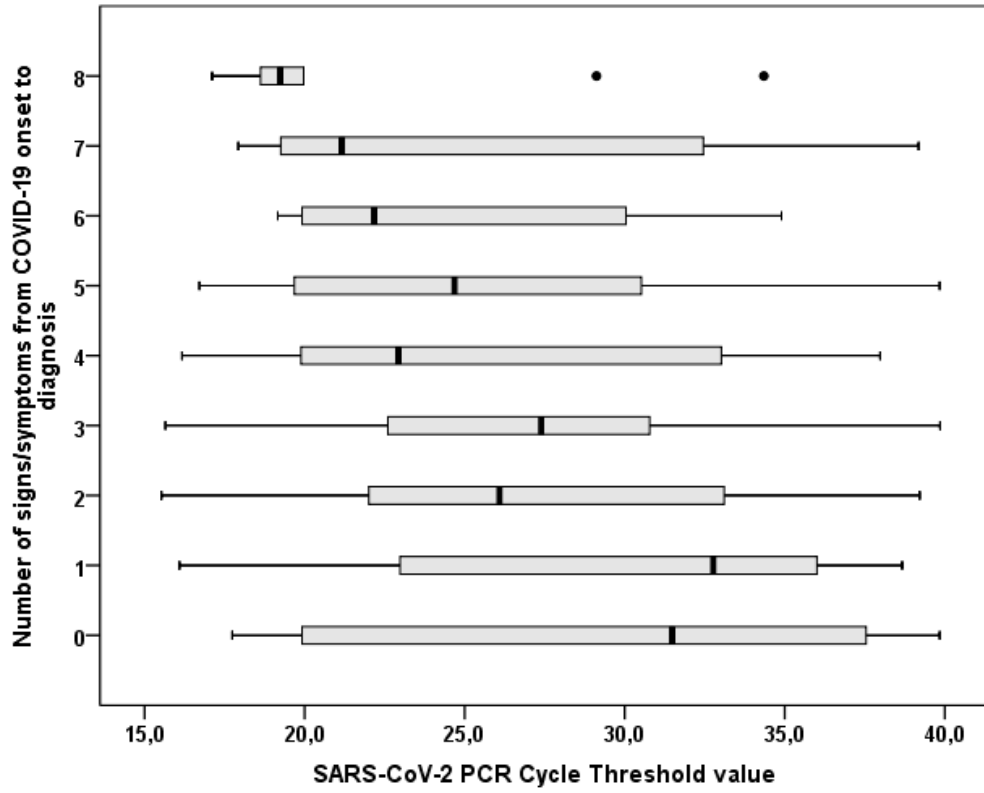

**Figure S3.** Distribution of SARS-CoV-2 PCR cycle threshold values according to the number of signs and symptoms of COVID-19 at diagnosis.
